# Supplementary material for: Simultaneous Mapping of Multiple Gene Loci with Pooled Segregants
Source: PubMed Central journal article supplement (PMC3575411; doi:10.1371/journal.pone.0055133), 2013-02-18
Supplement: pone.0055133.s001.pdf [file pone.0055133.s001.pdf]

## Supplementary Material - Table S1

**Table S1. Potential and “reliable” SNPs for the three chromosomes in every pool.**

|                | Pool 1 (16% ethanol tolerance) |                 | Pool 2 (17% ethanol tolerance) |                 |
|----------------|--------------------------------|-----------------|--------------------------------|-----------------|
|                | Potential SNPs                 | “Reliable” SNPs | Potential SNPs                 | “Reliable” SNPs |
| Chromosome II  | 76639                          | 3995            | 116722                         | 4151            |
| Chromosome IX  | 43380                          | 2703            | 62966                          | 2793            |
| Chromosome XIV | 72950                          | 2581            | 110978                         | 2619            |
